# Supplementary material
Source: PubMed Central journal article supplement (PMC6395535)

1 ***Online Repository***

2

3 **Allergen content in German cockroach extracts and sensitization profiles to a new**  
4 **expanded set of cockroach allergens determine *in vitro* extract potency for IgE reactivity**

5

6 J Glesner, BS<sup>a</sup>, S Filep, BS<sup>a</sup>, LD Vailes, MS<sup>a</sup>, S Wünschmann, PhD<sup>a</sup>, MD Chapman, PhD<sup>a</sup>, G

7 Birrueta, BS<sup>b</sup>, A Frazier, PhD<sup>b</sup>, KY Jeong, PhD<sup>c</sup>, C. Schal, PhD<sup>d</sup>, L Bacharier, MD<sup>e</sup>, A

8 Beigelman, MD<sup>e</sup>, P Busse, MD<sup>f</sup>, V Schulten, PhD<sup>b</sup>, A Sette, Dr.Biol.Sci.<sup>b,g</sup>, A Pomés, PhD<sup>a\*</sup>

9

10 <sup>a</sup> Indoor Biotechnologies, Inc., Charlottesville, VA, USA

11 <sup>b</sup> La Jolla Institute for Allergy & Immunology, La Jolla, CA, USA

12 <sup>c</sup> Department of Internal Medicine, Institute of Allergy, Yonsei University College of Medicine,

13 Seoul, Korea

14 <sup>d</sup> Department of Entomology and Plant Pathology, North Carolina State University, Raleigh, NC,

15 USA

16 <sup>e</sup> Department of Pediatrics, Washington University School of Medicine, St. Louis, MO, USA

17 <sup>f</sup> Division of Clinical Immunology, Icahn School of Medicine at Mount Sinai, New York, NY,

18 USA

19 <sup>g</sup> Department of Medicine, University of California San Diego, La Jolla, CA 92093

20

21 \*Corresponding Author:

22 Anna Pomés, PhD

23 Indoor Biotechnologies, Inc.

24 700 Harris Street

25 Charlottesville, VA 22903

26 Phone: 434 984 2304

27 Fax: 434 984 2709

28 e-mail: [apomes@inbio.com](mailto:apomes@inbio.com)

29

30

31

32

33

34

35

36

37

38

39

40

41

42

43

44

45

46

47

48

49

50

51

52

53

## 54 **Methods**

### 55 ***Measurement of Bla g 1, Bla g 2 and Bla g 5 in cockroach extracts by ELISA***

56 Levels of Bla g 1, Bla g 2 and Bla g 5 in cockroach extracts were measured by ELISA. Purified  
57 recombinant Bla g 1, purified natural Bla g 2 and purified recombinant Bla g 5, all prepared in  
58 1% BSA/50% glycerol/PBS, pH 7.4, were used as standards. The concentration of the three  
59 purified allergen standards was determined by amino acid analysis. The antibody pairs used in  
60 each assay are specified in parenthesis: Bla g 1 (10A6/pAb), Bla g 2 (7C11/pAb) and Bla g 5  
61 (17B12/pAb). Each extract was analyzed at two starting concentrations (1:10 and 1:1,000) with  
62 11 doubling dilutions across the plate and tested in triplicate for each dilution. The pAb were  
63 detected with peroxidase-labelled goat anti-rabbit IgG (Jackson ImmunoResearch Laboratories  
64 Inc., West Grove, PA). Assay development was performed as for IgE antibody inhibition assays.

65

### 66 ***Endotoxin measurement***

67 Each cockroach extract was analyzed for endotoxin content using the chromogenic *Limulus*  
68 Amoebocyte Lysate (LAL) assay (Lonza, Walkersville, MD). The extract was analyzed at a  
69 starting concentration of 1:100 with three 1:5 dilutions up to 1:12,500 and results were reported  
70 in Endotoxin Units (EU) per milliliter of extract.

71

### 72 ***Expression, purification and quantification of eight recombinant cockroach allergens***

73 German cockroach allergens Bla g 2 (GenBank accession code U28863), Bla g 4 (U40767), Bla  
74 g 6 (DQ279092) were constitutively expressed in *Pichia pastoris* using pGAPZ $\alpha$  vectors, while  
75 Bla g 1 (AF072219), Bla g 9 (DQ358231), Bla g 11 (DQ355516) were expressed using  
76 pPICZ/pPICZ $\alpha$  vectors by methanol induction for 48-96 hours. Per a 7 (isoform Per a 7.0102;

77 AF106961) was expressed by methanol induction using the *Pichia* pPIC9 vector. Per a 7.0102 is  
78 highly cross-reactive and shares 98.6% identity with Bla g 7.0101. Bla g 5 (U92412) was  
79 expressed in *Escherichia coli* using the pET-21a vector.

80

81 Bla g 1, Bla g 2 and Per a 7 were purified by specific-antibody affinity chromatography. Bla g 4  
82 was purified by phenol-sepharose chromatography, Bla g 5 by glutathione *S*-transferase affinity  
83 chromatography, and Bla g 6 by ion exchange and size exclusion chromatography. Bla g 9 and  
84 Bla g 11 were purified by metal affinity chromatography. Bla g 1, Per a 7, Bla g 9 and Bla g 11  
85 were quantified by Advanced Protein Assay (Cytoskeleton Inc., Denver, CO) while Bla g 2, Bla  
86 g 4, Bla g 5, and Bla g 6 by OD<sub>280</sub>.

87

#### 88 ***Biotinylation and optimization of biotinylation***

89 EZ-Link Sulfo-NHS-LC-Biotin (Thermo Scientific, Rockford, IL) was added to 2 mg of each  
90 allergen at a 10-20-fold molar excess, depending on the number of lysine residues in the  
91 sequence, and incubated for 30 minutes. The biotinylated mix was put over a pre-washed Zeba  
92 Desalt Spin Column (Thermo Scientific, Rockford, IL) 2 times and the concentration was  
93 determined after biotinylation by APA.

94

95 The quantification of biotinylation was carried out by using a Quant Tag™ Biotin Kit (Vector  
96 Laboratories, Burlingame, CA). Samples were tested in triplicate against a known biotin standard  
97 curve to determine the number of biotins per allergen molecule. Optimal number of biotins per  
98 molecule was considered between 2 and 6.

99

**100 Optimization of biotinylated allergen loaded to the streptavidin ImmunoCAP**

101 Streptavidin ImmunoCAPs (Thermo Fisher Scientific, Portage, MI) were loaded and incubated  
102 on a Phadia 100, with the biotinylated allergen at the following amounts: 0.5, 1, 2, 5, 10  $\mu\text{g}/\text{CAP}$ .  
103 Two different human plasma samples from individuals allergic to the allergen (that had been  
104 originally tested for IgE binding to 3  $\mu\text{g}/\text{CAP}$ ) were selected for optimization experiments. IgE  
105 binding to the allergen-loaded CAPs by the two selected plasma was measured in a Phadia 250  
106 following manufacturer's instructions (Thermo Fisher Scientific, Portage, MI). Results were  
107 plotted to select optimal amount of biotinylated allergen to be loaded to the streptavidin  
108 ImmunoCAPs.

109

**110 Measurement of IgE antibody levels by ImmunoCAP**

111 Biotinylated allergen was loaded and incubated on streptavidin ImmunoCAPs using the Phadia  
112 100. The ImmunoCAPs were transferred to the Phadia 250, where measurements of IgE antibody  
113 binding were performed according to manufacturer's instructions. Cockroach-specific IgE  
114 antibody binding was measured using commercially available CAPs loaded with cockroach  
115 extract (16 ImmunoCAPs supplied by Thermo Fisher Scientific). Most subjects (except 3) did not  
116 have IgE antibodies against at least one of the 8 allergens. These negative IgE values served as  
117 negative controls and indicated that positive values were allergen-specific. Also, sera from non-  
118 cockroach allergic patients ( $n = 10$ ) were used as negative controls. These sera were negative at a  
119 cut-off of 0.1  $\text{kU}_A/\text{L}$  in in-house streptavidin ImmunoCAPs either not loaded with allergen or  
120 loaded with each of 7 cockroach allergens (data not shown). Regardless, a conservative cut-off of  
121 0.35  $\text{kU}_A/\text{L}$  was chosen to make sure that IgE prevalences would not be overestimated due to low  
122 values between 0.1 and 0.35  $\text{kU}_A/\text{L}$ . In addition, and to assess possible non-specific IgE binding,

123 all plasma samples were run in streptavidin-CAPs not loaded with allergen. CCD binding to the  
124 allergens was not expected for most allergens since only three had N-glycosylation sites (two in  
125 Bla g 2 and one in Bla g 4 and Bla g 11). For the three plasma samples that reacted to all 8  
126 allergens, a test was run with a CCD inhibitor for these three allergens, to assess possible IgE  
127 binding to the carbohydrates (as explained below).

128

129 IgE binding to CCD present in allergens that contain N-glycosylation was assessed by adding a  
130 CCD-inhibitor to the plasma before measuring IgE binding to rBla g 2 and rBla g 4 (rBla g 1 was  
131 used as a negative control because it lacks N-glycosylation sites). The lyophilized RIDA CCD-  
132 Inhibitor (R-Biopharm AG, Darmstadt, Germany) was dissolved in sterile H<sub>2</sub>O, with vortexing.  
133 The CCD-Inhibitor (or sterile H<sub>2</sub>O for corresponding sample without inhibitor) was added at a  
134 dilution of 1:41 to sample plasma and incubated on an orbital shaker for one hour at room  
135 temperature. Samples were run on the Phadia 250 immediately after incubation.

136

### 137 *Specificity of the allergen-specific IgE measurements by ImmunoCAP*

138 The IgE measurements for the component analysis were allergen specific. This was proven by:  
139 1) all plasma had IgE antibody levels to streptavidin-CAPs (not loaded with allergen) that were  
140 under the cut-off of 0.35 kU<sub>A</sub>/L (except one with a low value of 0.59 kU<sub>A</sub>/L that was used to  
141 correct the allergen-specific levels (by subtracting 0.24 kU<sub>A</sub>/L, the difference between 0.59 and  
142 the cut-off); 2) most plasma did not bind one or more of the eight allergens (except three plasma  
143 that bound the 8 allergens), and these measurements acted as negative controls, and 3) the only  
144 three plasma with positive IgE values to all eight allergens tested, showed no difference in IgE

145 levels in presence versus absence of CCD inhibitor for two allergens with N-glycosylation (Bla g  
146 2 and Bla g 4) and without as a control (Bla g 1).

147

148

149

150

151

152

153

154

155

156

157

158

159

160

161

162

163

164

165

166

167

168

169

170

171

172

173

174

175 **Results**

176

177 **Table E1.** Cockroach-specific IgE, skin prick test wheal size, age and gender of the study cohort  
 178 of 23 individuals sensitized to cockroach.

179

**Information on cockroach allergic donors**

| Subject #     | Donor ID | CR-specific IgE (kU <sub>A</sub> /L) | SPT Wheal size (mm) | Age  | Gender  |
|---------------|----------|--------------------------------------|---------------------|------|---------|
| 1             | 1441     | 0.91                                 | 0                   | 47   | M       |
| 2             | 1439     | 0.94                                 | 8                   | 32   | M       |
| 3             | 2196     | 1.23                                 | n.d.                | 53   | M       |
| 4             | 1367     | 1.27                                 | 6                   | 37   | F       |
| 5             | 1006     | 1.32                                 | 0                   | 44   | M       |
| 6             | 1365     | 2.01                                 | 4.5                 | 49   | F       |
| 7             | 1665     | 2.24                                 | n.d.                | 26   | F       |
| 8             | 2083     | 3.41                                 | n.d.                | 23   | F       |
| 9             | 1231     | 4.47                                 | 3.5                 | 23   | F       |
| 10            | 1257     | 4.78                                 | 6                   | 37   | F       |
| 11            | 1864     | 4.82                                 | n.d.                | 37   | F       |
| 12            | 1406     | 5.30                                 | 4.5                 | 41   | F       |
| 13            | 1175     | 7.27                                 | 3                   | 43   | F       |
| 14            | 1437     | 8.32                                 | 9                   | 38   | F       |
| 15            | 2210     | 10.13                                | n.d.                | 28   | F       |
| 16            | 1398     | 10.50                                | 8.5                 | 30   | F       |
| 17            | 1229     | 12.20                                | 9                   | 49   | M       |
| 18            | 1446     | 17.30                                | 7.5                 | 50   | M       |
| 19            | 1425     | 36.00                                | 7                   | 39   | F       |
| 20            | 1424     | 45.20                                | 10                  | 30   | F       |
| 21            | 1228     | 56.50                                | 7                   | 54   | F       |
| 22            | 1277     | 66.20                                | 10                  | 53   | M       |
| 23            | 1445     | 76.20                                | 9                   | 32   | F       |
| Average       |          | 16.46                                |                     | 38.9 | 69.6% F |
| Std deviation |          | 22.76                                |                     | 9.8  | 30.4% M |

\* n.d. not determined

180

181



182 **Table E2.** Correlations of extract potencies (IC30) for IgE reactivity with 13 extracts for 5 subjects.  
 183 Single or double underlining of the donor ID denote the two groups of subjects identified. Within each  
 184 group, the correlations between pairs of subjects were significant (in bold;  $p < 0.001$ ).  
 185

|             | <u>1445</u>  | <u>1277</u> | <u>1424</u>  | <u>1425</u>  | <u>1864</u> |
|-------------|--------------|-------------|--------------|--------------|-------------|
| <u>1445</u> | 1            |             |              |              |             |
| <u>1277</u> | <b>0.947</b> | 1           |              |              |             |
| <u>1424</u> | 0.550        | 0.502       | 1            |              |             |
| <u>1425</u> | 0.447        | 0.436       | <b>0.940</b> | 1            |             |
| <u>1864</u> | 0.426        | 0.372       | <b>0.941</b> | <b>0.989</b> | 1           |

186  
 187  
 188  
 189  
 190  
 191  
 192  
 193  
 194  
 195  
 196  
 197  
 198  
 199  
 200  
 201  
 202  
 203  
 204  
 205  
 206  
 207

208 **Table E3.** Correlations of eight allergen-specific IgE for 5 subjects. The best correlation was between  
 209 subjects 1445 and 1277 ( $r = 0.693$ ,  $p = 0.057$ ).

210

|             | <u>1445</u> | <u>1277</u> | <u>1424</u> | <u>1425</u> | <u>1864</u> |
|-------------|-------------|-------------|-------------|-------------|-------------|
| <u>1445</u> | 1           |             |             |             |             |
| <u>1277</u> | 0.693       | 1           |             |             |             |
| <u>1424</u> | 0.249       | 0.170       | 1           |             |             |
| <u>1425</u> | 0.346       | 0.325       | 0.499       | 1           |             |
| <u>1864</u> | 0.136       | 0.010       | 0.559       | 0.331       | 1           |

211

212

213

214

215

216

217

218

219

220

221

222

223

224

225

226

227

228

229

230

231

232

233

234 **Table E4.** Correlations between extract potencies for IgE reactivity and allergen content of the  
 235 twelve extracts for five cockroach allergic patients.

236

| Patients | Correlations between extract potencies (IC30) and<br>extract allergen content ( $\mu\text{g/mL}$ ) |         |         |         |         |        | Allergen-specific IgE<br>( $\text{kU}_A/\text{L}$ ) |         |         |
|----------|----------------------------------------------------------------------------------------------------|---------|---------|---------|---------|--------|-----------------------------------------------------|---------|---------|
|          | Bla g 1 + Bla g 2 + Bla g 5                                                                        |         | Bla g 1 |         | Bla g 2 |        | Bla g 1                                             | Bla g 2 | Bla g 5 |
|          | r                                                                                                  | p       | r       | p       | r       | p      |                                                     |         |         |
| 1445     | 0.779                                                                                              | *0.0028 | 0.871   | *0.0002 | 0.469   | 0.1245 | 14.06                                               | 1.98    | 8.45    |
| 1277     | 0.773                                                                                              | *0.0032 | 0.838   | *0.0007 | 0.527   | 0.0784 | 7.56                                                | 5.82    | 0.45    |
| 1424     | 0.026                                                                                              | 0.9358  | 0.123   | 0.7035  | 0.193   | 0.5481 | 1.34                                                | 8.83    | 9.81    |
| 1425     | 0.306                                                                                              | 0.3337  | 0.265   | 0.4052  | 0.357   | 0.2540 | < 0.35                                              | 0.7     | 8.14    |
| 1864     | 0.375                                                                                              | 0.2302  | 0.476   | 0.1181  | 0.098   | 0.7613 | < 0.35                                              | 2.03    | < 0.35  |

237 Pearson's correlation coefficient r

238 \*  $p < 0.05$  indicates significance

239

240

241

242

243

244

245

246

247

248

249

250

251

252

253

254 **Table E5.** Correlations, for each extract, between German cockroach extract potencies and the  
 255 sum of allergen-specific IgEs of five subjects analyzed.

| Extract | Correlations between extract potencies (IC30) and |        |                                                |               | Three allergens/<br>protein concentr.<br>per extract<br>( $\mu\text{g}/\text{mg}$ ) |
|---------|---------------------------------------------------|--------|------------------------------------------------|---------------|-------------------------------------------------------------------------------------|
|         | Sum IgE to 3 allergens*<br>(kU <sub>A</sub> /L)   |        | Sum IgE to 8 allergens<br>(kU <sub>A</sub> /L) |               |                                                                                     |
|         | r                                                 | p      | r                                              | p             |                                                                                     |
| 1       | 0.395                                             | 0.5108 | <u>0.943</u>                                   | <u>0.0162</u> | <u>10.32</u>                                                                        |
| 2       | 0.024                                             | 0.9678 | 0.382                                          | 0.5254        | 4.20                                                                                |
| 3       | 0.621                                             | 0.2635 | <u>0.896</u>                                   | <u>0.0397</u> | <u>4.87</u>                                                                         |
| 4       | 0.139                                             | 0.8241 | 0.608                                          | 0.2764        | 4.56                                                                                |
| 5       | 0.696                                             | 0.1921 | <u>0.977</u>                                   | <u>0.0041</u> | <u>12.33</u>                                                                        |
| 6       | 0.407                                             | 0.4969 | 0.765                                          | 0.1319        | 4.77                                                                                |
| 7       | 0.452                                             | 0.4449 | <u>0.972</u>                                   | <u>0.0056</u> | <u>10.32</u>                                                                        |
| 8       | 0.037                                             | 0.9521 | <u>0.746</u>                                   | <u>0.0466</u> | <u>8.16</u>                                                                         |
| 9       | n/a                                               | n/a    | n/a                                            | n/a           | 10.27                                                                               |
| 10      | 0.275                                             | 0.6540 | <u>0.914</u>                                   | <u>0.0297</u> | <u>26.02</u>                                                                        |
| 11      | 0.552                                             | 0.3343 | <u>0.945</u>                                   | <u>0.0154</u> | <u>29.33</u>                                                                        |
| 12      | 0.553                                             | 0.3341 | <u>0.956</u>                                   | <u>0.0109</u> | <u>53.86</u>                                                                        |
| 13      | n/a                                               | n/a    | n/a                                            | n/a           | 0                                                                                   |

256 \*Bla g 1, Bla g 2 and Bla g 5

257 Pearson's correlation coefficient (r)

258 p < 0.05 indicates significance (data associated with a significant correlation are underlined)

259 n/a: Not applicable (#9 is the reference extract and #13 is the negative control)

260

261

262

263

264

265

266

267

268 **Figure legends**

269

270 **Figure E1.** Proportion of allergen-specific IgE versus the sum of eight allergen-specific IgE in  
271 the cockroach allergic subjects (n = 23). This figure represents a normalization to percentages of  
272 data from Figure 2, including data below the 0.35 kU<sub>A</sub>/L threshold (as 0.35 values).

273

274 **Figure E2.** Inhibition assays to determine the *in vitro* potencies for IgE reactivity of extracts in  
275 five cockroach allergic subjects. Results are from four representative subjects out of five  
276 analyzed. Plots show means with standard deviations of duplicates. The reference curves for  
277 each of the three plates used in the experiment are #9-1, #9-2 and #9-3.

Figure E1.

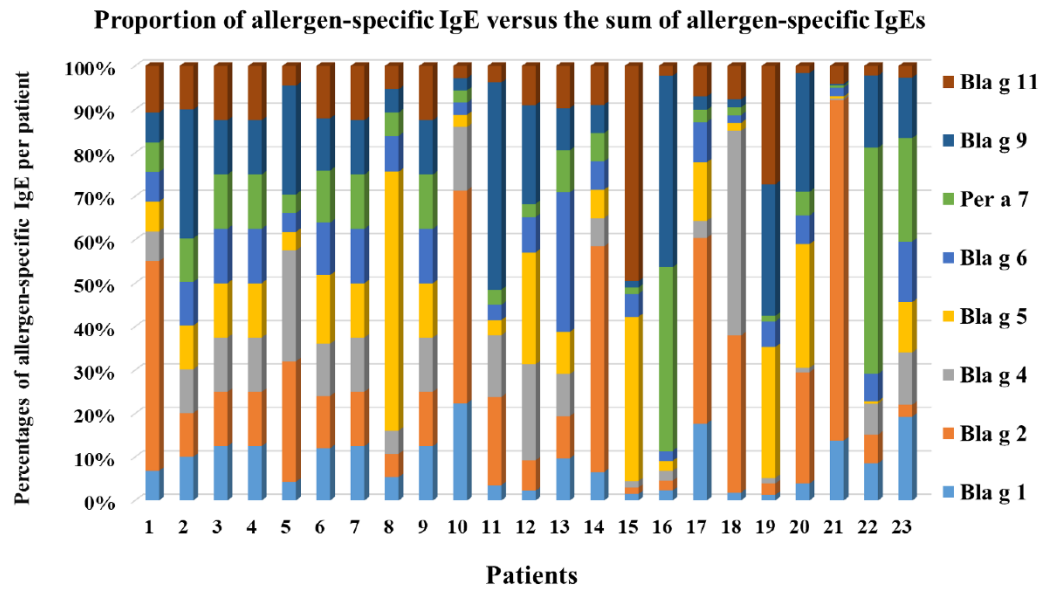

Figure E2.

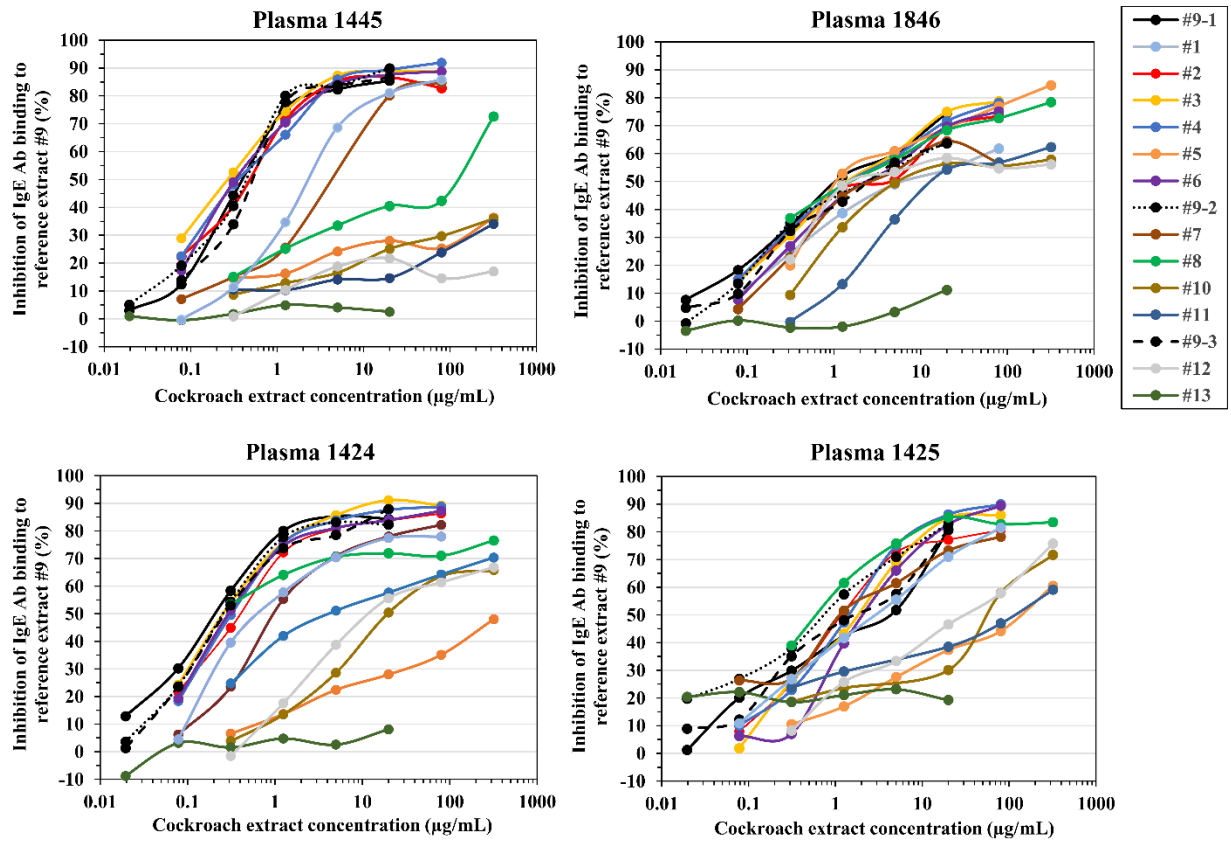

Supplement: NIHMS1505497-supplement-Definitive_Supplemental.pdf [file NIHMS1505497-supplement-Definitive_Supplemental.pdf]
